# Supplementary material
Source: PubMed Central journal article supplement (PMC5835689)
Supplement: NIHMS803958-supplement-1.pdf [file NIHMS803958-supplement-1.pdf]

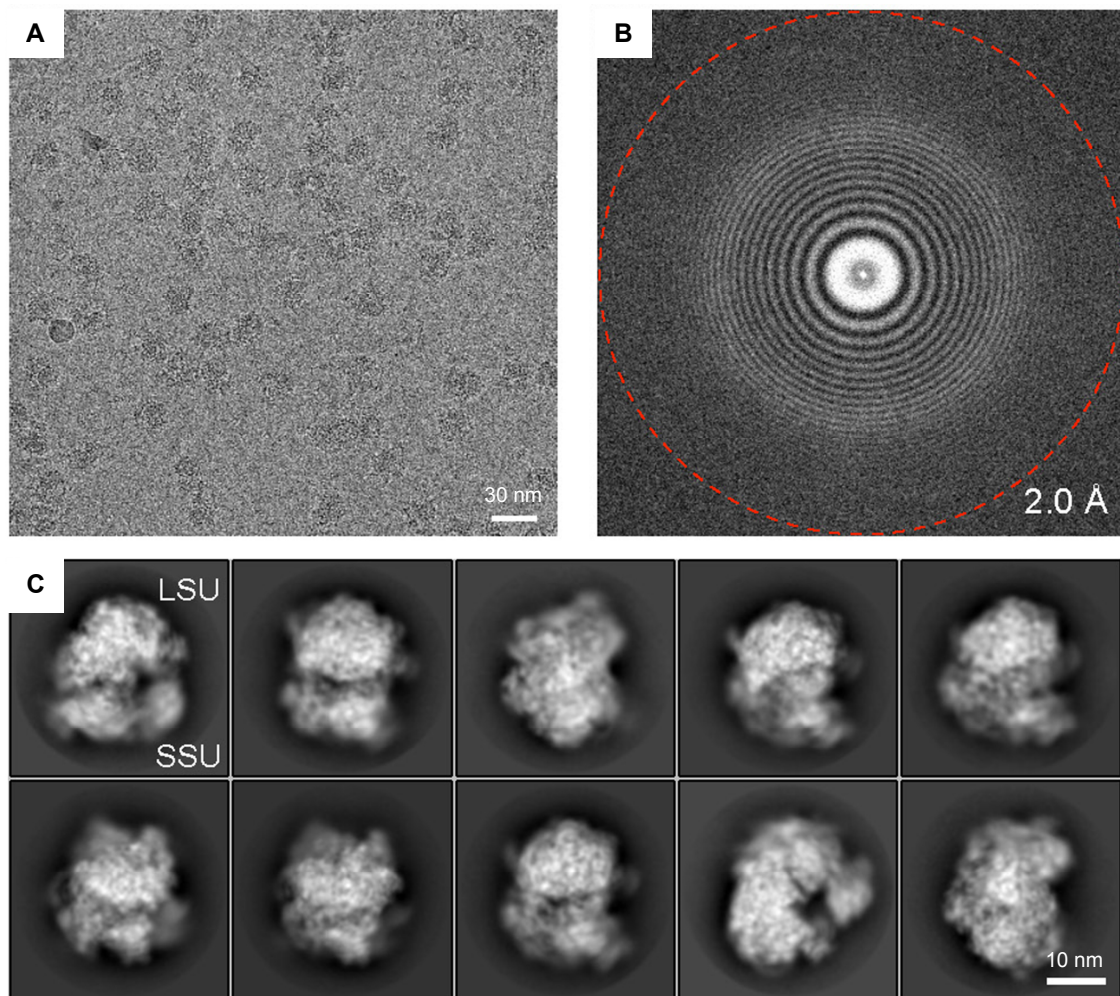

**Figure S1: Cryo-EM of *L. donovani* ribosome, related to Figure 1.**

(A) Representative cryo-EM micrograph of *L. donovani* ribosome recorded at -0.8 micrometer defocus (scale bar, 30 nm). (B) Global power spectrum obtained from the motion corrected micrograph at 1 Å/pixel in (A) shows Thon rings up to edge of the spectrum (~2.0 Å, dashed circle in red). (C) Representative 2D class averages of the *L. donovani* ribosome showing well defined density for the LSU but blurred out density for the SSU (scale bar, 10 nm).

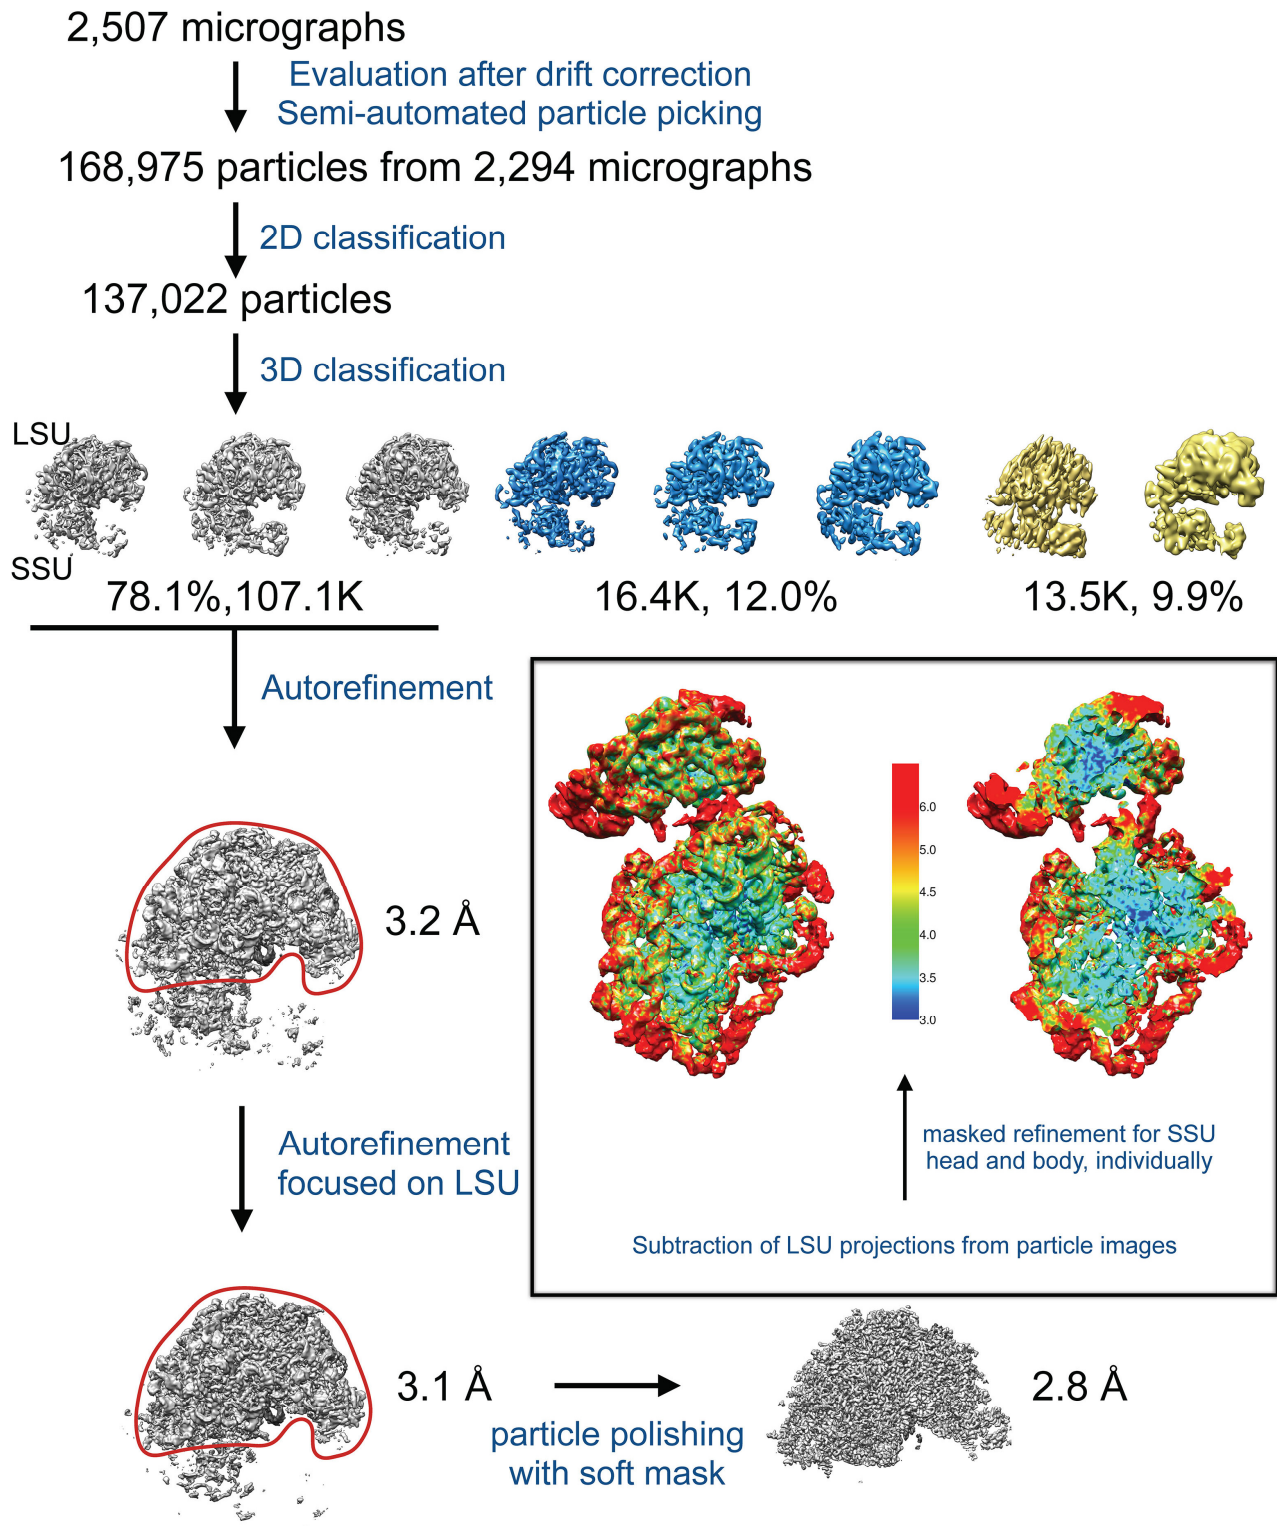

**Figure S2: Particle projection selection, classification, and 3D map reconstruction, related to Figure 1.**

Flow chart of cryo-EM data processing of *L. donovani* ribosome. Details are provided in the Methods section.

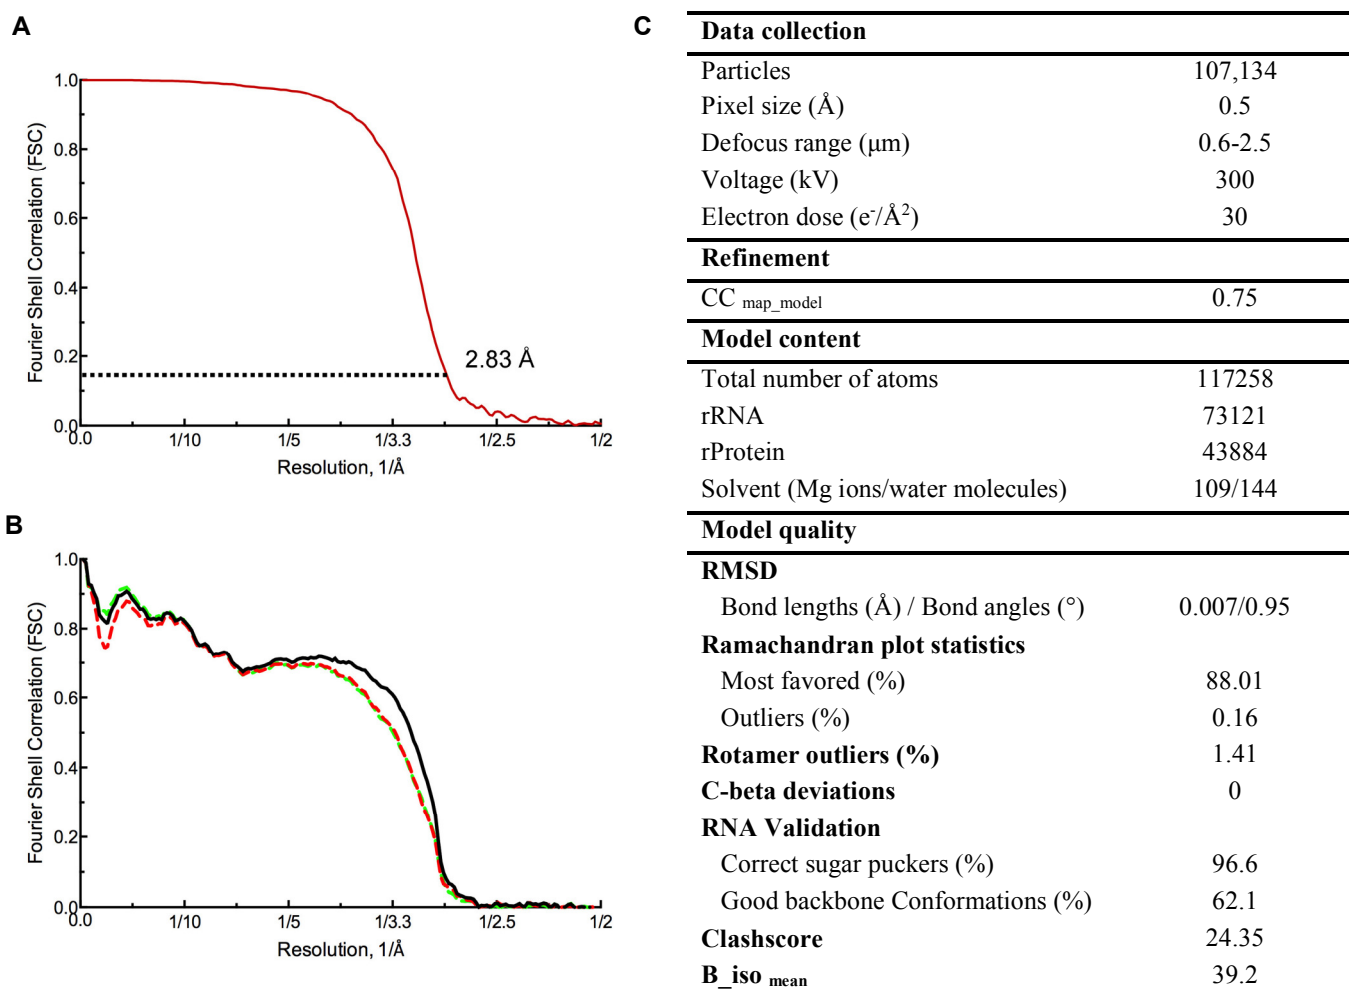

**Figure S3: Quality of 3D map, comparison to model and data parameters, related to Figure 1.**

(A) Gold standard FSC curve for the final 3D map of LSU indicates a resolution of 2.83 Å (FSC=0.143 criterion). (B) FSC curves of the final refined model versus the final cryo-EM map (full dataset, black), of the outcome of model refinement with a half map versus the same map (red), and of the outcome of model refinement with a half map versus the other half map (green). The excellent agreement between red and green curves indicates lack of overfitting. (C) Cryo-EM data collection and LSU model refinement. Model refinement was performed using *phenix.real\_space\_refine* (Afonine et al., 2013).



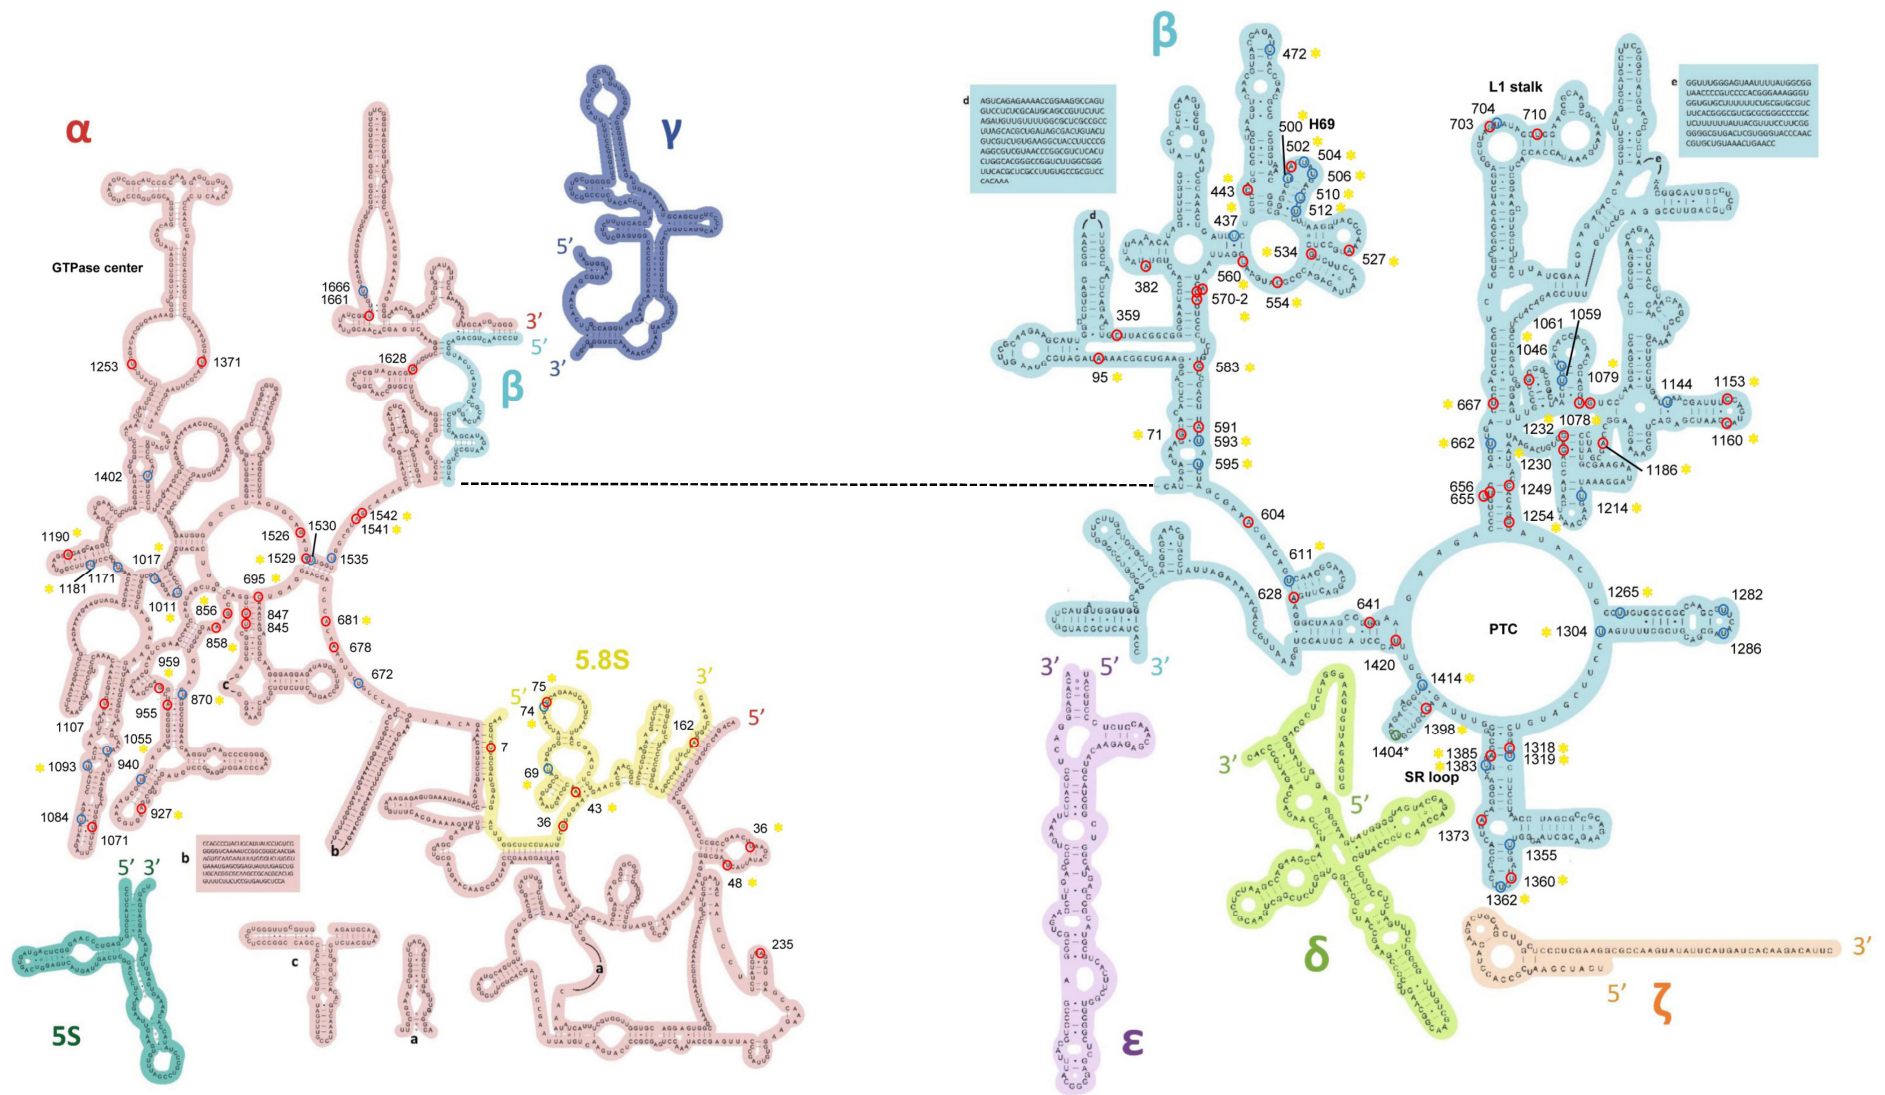

**Figure S4: *L. donovani* LSU rRNA 2D maps, related to Figure 2.**

*Leishmania* LSU 2D maps were derived from the 3D cryo-EM map. Ribosomal RNA modifications are highlighted in red (2'-O methylation), blue (pseudouridinylation) and green (dihydrouridine). Conserved positions amongst eukaryotic species are marked in yellow asterisk.

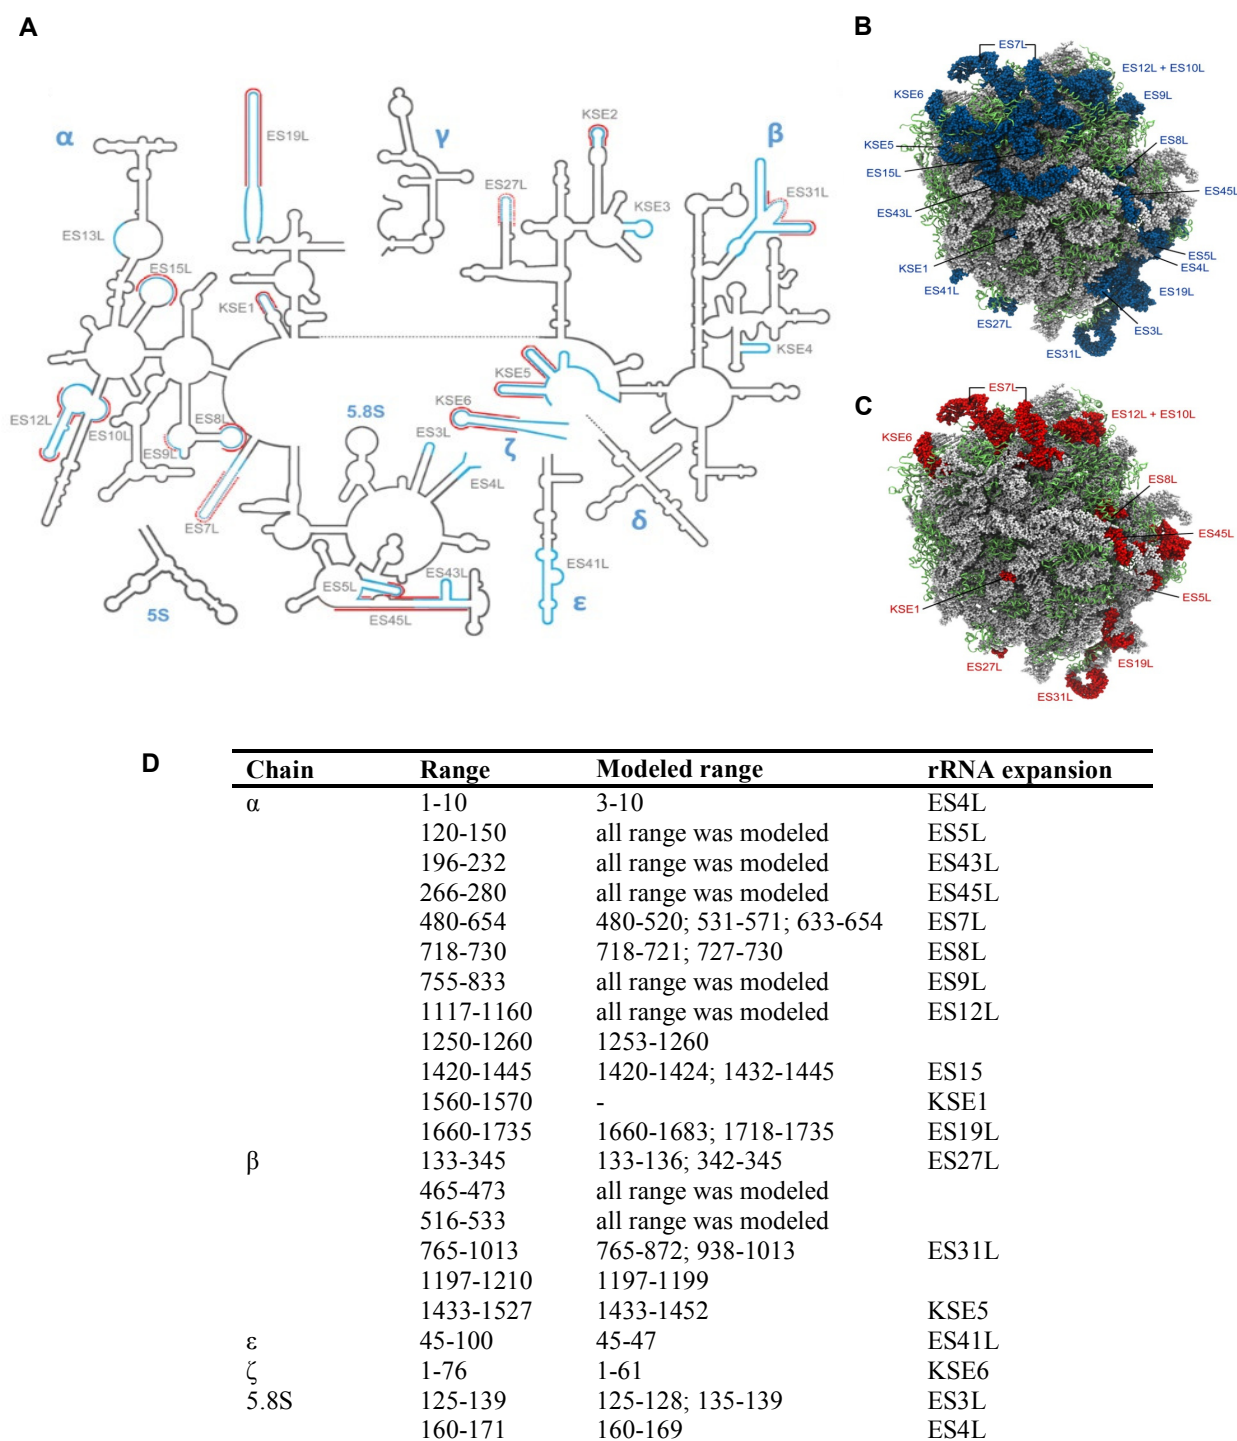

**Figure S5: rRNA expansions in *L. donovani*, related to Figure 2.**

Secondary (A) and tertiary (B-C) structures highlighting leishmanial ribosome specific expansions compared to other organisms. Eukaryote specific expansions are highlighted in blue; variable regions amongst kinetoplastids are marked in red (C) Tertiary representation highlighting variable regions among different species belonging to the kinetoplastid class. rRNA expansions are colored as in panels A-B; ribosomal proteins are shown as light green ribbons. (D) *L. donovani* specific rRNA extensions found in the structure with their corresponding numbering range in the chain, their modeled range and their nomenclature. Extension names are according to the *homo-sapiens* nomenclature presented by Anger *et al.* (Anger *et al.*, 2013) (ES - eukaryote specific). Kinetoplastid specific extensions were defined as KSE (kinetoplastid specific extension) and numbered according to their order of appearance in the rDNA gene.



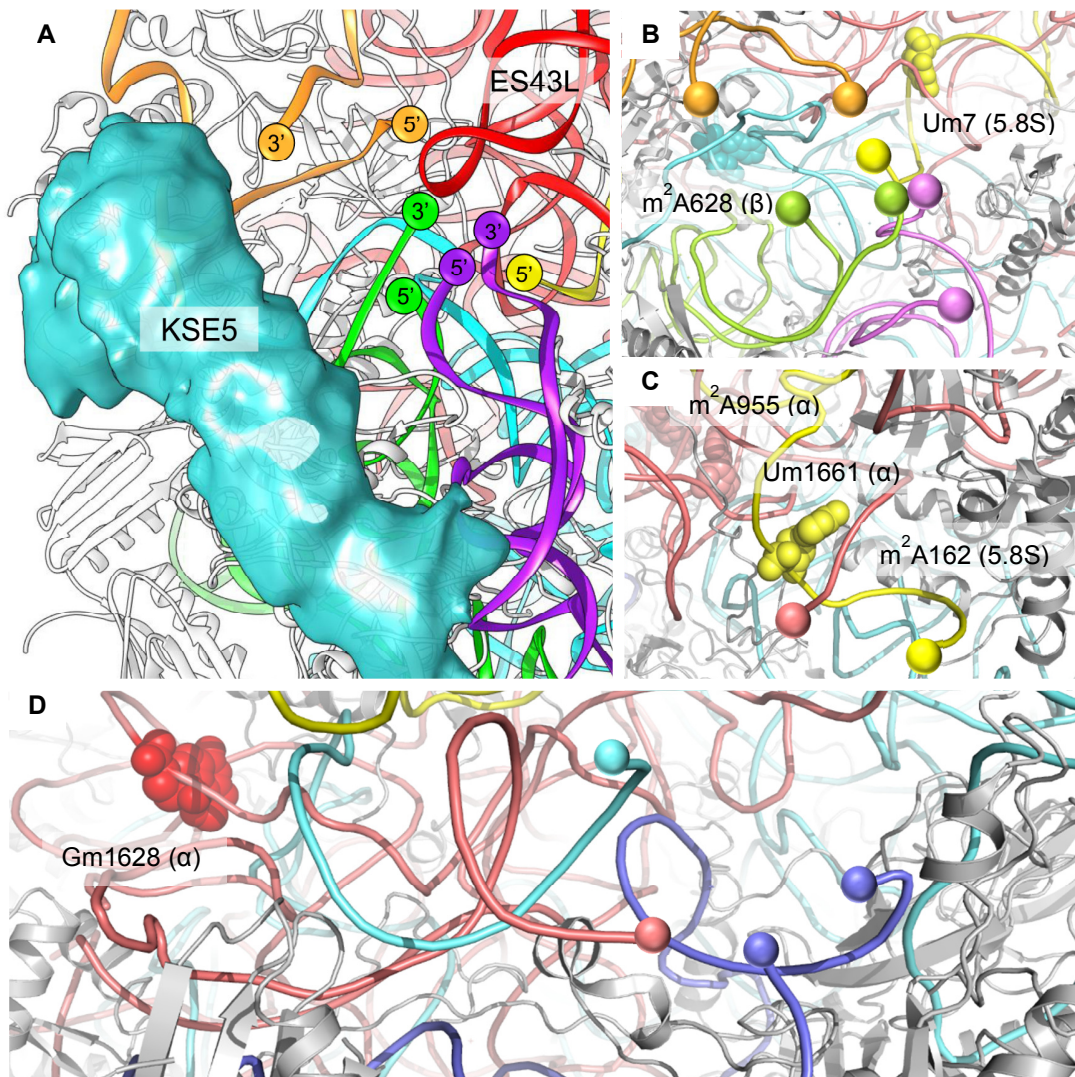

**Figure S6: Focal point organization and rRNA modifications in *Leishmania*, related to Figures 3-4.**

(A) Seven rRNA chain terminals converge to a focal point (point I) facing the solvent exposed ribosome surface. Two kinetoplastid rRNA extensions, ES43L and KSE5, are located in close proximity to the focal; thus suspected to play an importance in focal point organization or even take part at the kinetoplastid unique cleavage mechanism. ES43L belongs to the alpha chain and is highly extended in kinetoplastids. KSE5 is a kinetoplastid specific rRNA domain located on the 3' end of the beta chain. KSE5 (semitransparent cyan surface) is highly flexible, observed only at low resolution in 3D maps, and was thus not modeled in the structure. Modeled rRNA chains are presented as ribbons with red, cyan, green, purple, orange and yellow for alpha, beta, delta, epsilon, zeta and 5.8S respectively. The high resolution structure enabled the validation of modified RNA residues. Six kinetoplastid specific modifications are spread across focal points I (B), II (C) and III (D). Modified residues are highlighted as all-atom-spheres and are colored according to their rRNA chain respective color.

| Universal name | Chain ID | Length | Modeled range | Initial model          | TritrypDB ID    | GR356 seq alternations | MS score (Mascot) |
|----------------|----------|--------|---------------|------------------------|-----------------|------------------------|-------------------|
| Alpha 26S      | 1        | 1782 b | 3-1781        | 4V8P/4V8M/4UGO/De-novo | LdBPK_27rRNA4   | -                      | -                 |
| Beta 26S       | 2        | 1526 b | 2-1451        | 4V8P/4V8M/4UGO/De-novo | LinJ.27.rRNA1   | -                      | -                 |
| Gamma 26S      | 3        | 213 b  | 3-210         | 4V8P                   | LdBPK_27rRNA3   | -                      | -                 |
| Delta 26S      | 4        | 183 b  | 25-183        | 4V8P                   | LinJ.27.rRNA2   | -                      | -                 |
| Epsilon 26S    | 5        | 133 b  | 1-133         | 4V8P                   | LmjF.27.rRNA.43 | -                      | -                 |
| Zeta 26S       | 6        | 76 b   | 1-61          | 4V8M/De-novo           | -               | -                      | -                 |
| 5.8S           | 7        | 171 b  | 1-169         | 4V8P                   | LdBPK_27rRNA5   | -                      | -                 |
| 5S             | 8        | 121 b  | 1-120         | 4V8P                   | LdBPK_23rRNA1   | -                      | -                 |
| P0             | -        | 108 aa | -             | -                      | LdBPK_150430.1  | -                      | 602.82            |
| P1,P2          | -        | 105 aa | -             | -                      | LdBPK_303780.1  | -                      | 1981.39           |
| uL1            | -        | 78 aa  | -             | -                      | LdBPK_363950.1  | -                      | 1425.56           |
| uL2            | A        | 260 aa | 2-246         | 4V8M                   | LdBPK_351450.1  | -                      | 1100.8            |
| uL3            | B        | 419 aa | 5-400         | 4V8M                   | LdBPK_323320.1  | -                      | 461.9             |
| uL4            | C        | 373 aa | 5-305         | 4V8M                   | LdBPK_291160.1  | -                      | 4788.7            |
| uL5            | D        | 188 aa | 9-169         | 4V8M                   | LdBPK_220004.1  | -                      | 2077.3            |
| uL6            | E        | 190 aa | 1-190*        | Homology model         | LdBPK_211290.1  | A189M                  | 2815.1            |
| eL6            | F        | 195 aa | 20-195        | 4UGO                   | LdBPK_330770.1  | -                      | 537.9             |
| eL8            | G        | 348 aa | 113-339       | 4UGO                   | LdBPK_070550.1  | -                      | 4773.5            |
| uL11           | -        | 164 aa | -             | -                      | LdBPK_352230.1  | V12I                   | 2766.7            |
| uL13           | H        | 222 aa | 21-222        | 4V8M                   | LdBPK_340910.1  | -                      | 393.67            |
| eL13           | I        | 220 aa | 2-133         | 4V8M                   | LdBPK_292580.1  | A173T; V202A; T219A    | 163.52            |
| uL14           | J        | 139 aa | 12-139        | 4UGO                   | LdBPK_353840.1  | -                      | 5275.24           |
| eL14           | K        | 233 aa | 41-192        | 4V8M                   | LdBPK_221370.1  | -                      | 974.92            |
| uL15           | L        | 145 aa | 2-145         | 4V8M                   | LdBPK_353810.1  | -                      | 723.71            |
| eL15           | M        | 204 aa | 2-204         | 4V8M                   | LdBPK_303710.1  | -                      | 2914.74           |
| uL16           | N        | 213 aa | 1-213*        | Homology model         | LdBPK_040750.1  | R203K                  | 1565.46           |
| uL18           | O        | 305 aa | 8-267         | 4V8M                   | LdBPK_351870.1  | -                      | 1299.83           |
| eL18           | P        | 198 aa | 4-198         | 4V8M                   | LdBPK_364730.1  | -                      | 1538.97           |
| eL19           | Q        | 245 aa | 2-157         | 4V8M                   | LdBPK_060410.1  | -                      | 1214.43           |
| eL20           | R        | 179 aa | 4-133         | 4V8M                   | LdBPK_350600.1  | L158I                  | 1363.47           |
| eL21           | S        | 159 aa | 2-150         | 4V8M                   | LdBPK_343440.1  | -                      | 1711.16           |
| uL22           | T        | 166 aa | 2-155         | 4V8M                   | LdBPK_240040.1  | -                      | 2024.69           |
| eL22           | U        | 122 aa | 23-122        | 4V8M                   | LdBPK_363430.1  | Δ10 aa (N-term)        | 1319.34           |
| uL23           | V        | 145 aa | 27-144        | 4V8M                   | LdBPK_060600.1  | -                      | 2286.36           |
| uL24           | W        | 143 aa | 8-124         | 4V8M                   | LdBPK_242140.1  | -                      | 602.39            |
| eL24           | X        | 124 aa | 2-65          | 4V8M                   | LdBPK_361130.1  | -                      | 55.22             |
| eL27           | Y        | 134 aa | 3-134         | 4V8M                   | LdBPK_322850.1  | -                      | 1612.83           |
| eL28           | Z        | 147 aa | 2-123         | 4V8M                   | LdBPK_111110.1  | -                      | 758.34            |
| uL29           | a        | 127 aa | 3-126         | 4V8M                   | LdBPK_262350.1  | -                      | 269.04            |
| eL29           | b        | 70 aa  | 9-70          | 4VGO                   | LdBPK_363550.1  | -                      | 292.42            |
| uL30           | c        | 252 aa | 31-252        | 4V8M                   | LdBPK_260160.1  | G49A                   | 2059.04           |
| eL30           | d        | 104 aa | 11-98         | 4V8M                   | LdBPK_350240.1  | -                      | 1647.18           |
| eL31           | e        | 183 aa | 70-181        | 4V8M                   | LdBPK_353340.1  | -                      | 1929.41           |
| eL32           | f        | 133 aa | 3-128         | 4V8M                   | LdBPK_212090.1  | T105K                  | 805.97            |
| eL33           | g        | 145 aa | 20-144        | 4V8M                   | LdBPK_342240.1  | -                      | 500.68            |
| eL34           | h        | 168 aa | 2-111         | 4V8M                   | LdBPK_363930.1  | -                      | 296.77            |
| eL36           | i        | 106 aa | 38-100        | 4V8M                   | LdBPK_210800.1  | -                      | 866.33            |
| eL37           | j        | 83 aa  | 2-79          | 4V8M                   | LdBPK_332070.1  | -                      | 171.75            |
| eL38           | k        | 83 aa  | 2-59          | 4V8M                   | LdBPK_262230.1  | -                      | 604.23            |
| eL39           | l        | 51 aa  | 2-51          | 4V8M                   | LdBPK_161220.1  | -                      | 104.41            |
| eL40           | m        | 128 aa | -             | -                      | LdBPK_311930.1  | -                      | 96.93             |
| eL41           | -        | -      | -             | -                      | -               | -                      | -                 |
| eL43           | n        | 92 aa  | 2-92          | 4V8M                   | LdBPK_362020.1  | -                      | 688.30            |
| eL44           | o        | 106 aa | 2-97          | 4V8M                   | LdBPK_333380.1  | -                      | 301.46            |

**Table S1: rProtein and rRNA sequence affiliation, modeling and mass spectroscopy, related to main text and Figure 2.**

Protein nomenclature has been adopted from *Ban et al.* (Ban et al., 2014). rRNA and rProtein lengths and their modeled range within the cryo EM derived model. Initial models that were used as preliminary guiding templates for model building are listed by their PDB IDs and ribosome model identity. *De-novo* refers to kinetoplastid specific extensions that were manually built in the cryo-EM map without an initial model. Proteins L6 and L16 were built by homology modeling using I-TASSER (Yang et al., 2015) and docked into the cryo-EM map. rRNA and rProtein sequences were derived from a whole genome sequencing of *L. donovani* [MHOM/ET/2009/GR356 clone IV] (unpublished data) and were annotated according to the TriTrypDB. Alterations to the published sequences are highlighted. MS Mascot scores for rProteins in the sample used for cryo-EM are also highlighted above.

| Modification   | Position/Chain <sup>a</sup> | Map sigma level <sup>b</sup> | Prediction in Leish <sup>c</sup> |               |
|----------------|-----------------------------|------------------------------|----------------------------------|---------------|
| Am             | 2'-O-methyladenosine        | 678/ $\alpha$                | 3.0                              | Y             |
|                |                             | 681/ $\alpha$                | 3.0                              | Y             |
|                |                             | 927/ $\alpha$                | 2.7                              | Y             |
|                |                             | 955/ $\alpha$                | 2.0                              | Y             |
|                |                             | 1541/ $\alpha$               | 3.0                              | Y             |
|                |                             | 382/ $\beta$                 | 3.0                              | Y             |
|                |                             | 527/ $\beta$                 | 3.0                              | Y             |
|                |                             | 572/ $\beta$                 | 3.0                              | N             |
|                |                             | 591/ $\beta$                 | 3.0                              | Y             |
|                |                             | 604/ $\beta$                 | 3.0                              | Y             |
|                |                             | 628/ $\beta$                 | 3.0                              | Y             |
|                |                             | 1186/ $\beta$                | 3.0                              | N             |
|                |                             | 162/5.8S                     | 3.0                              | Y             |
|                |                             | Gm                           | 2'-O-methylguanosine             | 856/ $\alpha$ |
| 959/ $\alpha$  | 2.0                         |                              |                                  | Y             |
| 1526/ $\alpha$ | 3.0                         |                              |                                  | Y             |
| 1542/ $\alpha$ | 3.0                         |                              |                                  | N             |
| 1628/ $\alpha$ | 3.0                         |                              |                                  | Y             |
| 71/ $\beta$    | 3.0                         |                              |                                  | Y             |
| 534/ $\beta$   | 3.0                         |                              |                                  | Y             |
| 571/ $\beta$   | 3.0                         |                              |                                  | N             |
| 641/ $\beta$   | 3.0                         |                              |                                  | Y             |
| 655/ $\beta$   | 3.0                         |                              |                                  | Y             |
| 1079/ $\beta$  | 3.0                         |                              |                                  | N             |
| 1230/ $\beta$  | 3.0                         |                              |                                  | Y             |
| 1254/ $\beta$  | 3.0                         |                              |                                  | Y             |
| 75/5.8S        | 3.0                         |                              |                                  | Y             |
| Cm             | 2'-O-methylcytidine         | 695/ $\alpha$                | 3.0                              | Y             |
|                |                             | 1529/ $\alpha$               | 2.5                              | Y             |
|                |                             | 443/ $\beta$                 | 3.0                              | N             |
|                |                             | 554/ $\beta$                 | 3.0                              | Y             |
|                |                             | 583/ $\beta$                 | 3.0                              | Y             |
|                |                             | 1160/ $\beta$                | 2.0                              | Y             |
|                |                             | 1249/ $\beta$                | 3.0                              | Y             |
|                |                             | 1318/ $\beta$                | 2.5                              | N             |
|                |                             | 1398/ $\beta$                | 3.0                              | Y             |
| Um             | 2'-O-methyluridine          | 36/ $\alpha$                 | 1.6                              | N             |
|                |                             | 48/ $\alpha$                 | 1.5                              | N             |
|                |                             | 845/ $\alpha$                | 3.0                              | Y             |
|                |                             | 847/ $\alpha$                | 4.0                              | Y             |
|                |                             | 1371/ $\alpha$               | 2.5                              | Y             |
|                |                             | 656/ $\beta$                 | 2.0                              | N             |
|                |                             | 667/ $\beta$                 | 3.0                              | Y             |
|                |                             | 1078/ $\beta$                | 2.2                              | Y             |
|                |                             | 1153/ $\beta$                | 2.2                              | N             |
|                |                             | 7/5.8S                       | 3.0                              | Y             |
| D              | Dihydrouridine              | 1404/ $\beta$                | 3.0                              | Y             |

**Table S2: rRNA modifications in *L. donovani* LSU, related to Figure 4.**

rRNA modifications in trypanosomatid 67S LSU observed in the density maps. Modified positions (**a**) are presented with relative locations within the rRNA chains. The sigma levels at which each modification is clearly visible are presented in (**b**). Predictions for *Leishmania* and *Trypanosoma* were adopted from Liang *et al.* (Liang *et al.*, 2005) and Eliaz *et al.* (Eliaz *et al.*, 2015).



## Supplemental Experimental Procedures

### Parasite handling and ribosome purification

*L. donovani* [MHOM/ET/2009/GR356 clone IV] promastigotes isolated from the spleen of a VL patient in northern Ethiopia (Zackay et al., 2013) were grown in complete M199 medium containing 10% fetal calf serum at 26°C to a cell density of  $2 \times 10^7$  parasites/mL. Cells were harvested at 4°C (4000 g), washed 3 times in **resuspension buffer** [45 mM HEPES-KOH pH 7.6, 100 mM KOAc, 10 mM Mg(OAc)<sub>2</sub> and 250 mM Sucrose] and then suspended in **buffer A** [45 mM HEPES-KOH pH 7.6, 100 mM K(OAc), 10 mM Mg(OAc)<sub>2</sub>, 250 mM Sucrose, 5 mM β-mercaptoethanol and a 1:40 dilution of RNasin U (Promega)] to reach a final concentration of  $1.5 \times 10^9$  cells/mL. Cell disruption was performed by nitrogen cavitation [90 bar, 45 min, 4°C] followed by centrifugation steps designed to remove cell debris [30 min at 16,000 g followed by 10 min at 30,000 g, both performed at 4°C using Ti70 rotor (Beckman)]. Clarified supernatant was gently loaded onto a 1.1 M sucrose cushion in **Buffer B** [20 mM HEPES-KOH pH 7.6, 150 mM KOAc, 10 mM Mg(OAc)<sub>2</sub>, 1.1 M sucrose and 5 mM β-mercaptoethanol] and centrifuged at 115,800 g at 4°C for 16.5 h (Ti70 rotor, Beckman). The ribosome enriched pellet was resuspended at 4°C in **Buffer C** [20 mM HEPES-KOH pH 7.6, 150 mM KOAc, 10 mM Mg(OAc)<sub>2</sub> and 5 mM β-mercaptoethanol] and subjected to a 15-30% sucrose gradient centrifugation in **Buffer C** (25,000 rpm, 11 h, at 4°C on SW28 rotor, Beckman). The 91S peak was collected, and centrifuged at 56,000 rpm for 12 h at 4°C. The pellet was suspended in **Buffer D** [20 mM HEPES-KOH pH 7.6, 100 mM KOAc, 10 mM Mg(OAc)<sub>2</sub>, 10 mM NH<sub>4</sub>OAc and 1 mM DTT], centrifuged for 1.5 h at 75,000 rpm (Ti100 rotor, Beckman), and the 91S ribosome pellet resuspended in **Buffer D** at a final concentration of 5 mg/mL. Aliquots were flash frozen in liquid nitrogen and stored in -80°C until further use.

### Cryo-EM data acquisition

*L. donovani* 91S ribosomal samples were diluted to 50 nM and 3.5 μL were applied on glow-discharged holey carbon grids (Quantifoil R2/2, 200 mesh) coated with a continuous thin carbon film. The grids were blotted and plunge-frozen using a Vitrobot Mark IV (FEI Company). Cryo-EM micrographs were collected at liquid nitrogen temperature on a Titan Krios electron microscope (FEI) operating at 300 kV. Micrographs were recorded at a nominal magnification of 29,000X using a K2 Summit direct electron detector (Gatan, Inc.) in super-resolution mode, corresponding to a pixel size of 0.5 Å/pixel, with a dose rate of ~5.0 electrons/Å<sup>2</sup>/s and defocus values ranging from 0.6 to 2.5 μm. The total exposure time was 6.0 s and intermediate frames were recorded in 0.2 s intervals resulting in an accumulated dose of ~30 electrons per Å<sup>2</sup> and a total of 30 frames per micrograph.

### Cryo-EM image processing and 3D reconstructions

A total of 2,507 cryo-EM images were recorded during one microscope session. Dose fractionated super-resolution image stacks were binned 2 X 2 and subjected to whole-frame motion correction using MotionCorr (Li et al., 2013). The power-spectra of motion corrected images were evaluated to remove micrographs showing resolution lower than ~3 Å and visible astigmatism, resulting in a working dataset of 2,294 micrographs. A sum of all frames in each image stack was used for further processing. CTF parameters for each micrograph were determined by CTFFIND3 (Sander et al., 2003).

Particle selection, two-dimensional classification and three-dimensional classification were performed on a binned dataset with a pixel size of 2 Å and a box size of 192 X 192 pixels using RELION 1.3 (Scheres, 2012). In total, 168,975 particles were extracted using semi-automated particle selection procedures. In a first step, the particle projections were subjected to reference-free two-dimensional classification in order to identify and discard falsely selected particles or particles categorized in poorly defined classes (**Fig. S1**). The

resulting particle dataset of 137,022 projections was next subjected to unsupervised three-dimensional classification using a 60-Å low-pass filtered cryo-EM map of the yeast *Saccharomyces cerevisiae* ribosome (EMD-1076) as initial reference in order to sort out projections contributing to classes with the most detailed features for the ribosomal large subunit (LSU) (**Fig. S2**). The three-dimensional classification was executed with 8 classes starting with an angular sampling of 7.5°, followed sequentially by angular sampling of 1.8° and 0.9° combined with local angular searches. A total of 107,134 particle projections (78.1% of the input dataset) in the three best defined classes were used for auto-refinement with RELION 1.3 using data with a pixel size of 1 Å, a box size of 384 X 384 pixels, and image stacks including all movie sub-frames. The resulting 3D map (3.2-Å resolution) was subjected to a cycle of focused refinement of the LSU producing a map at 3.1-Å resolution, which was subsequently used for single-particle movie processing (particle polishing) with 3 running averages. In addition, the RELION 1.3 resolution-dependent radiation damage model was used to weigh B-factors for each movie frame. The polished particle projections were used for the final refinement step with a soft mask covering the entire LSU, producing the final map at 2.8-Å resolution.

Given the flexibility of the SSU in respect to the LSU, as observed in 2D classification and map refinement, we employed masked refinement with signal subtraction to improve the resolution for its density. To this end, LSU projections were subtracted from the experimental particle images using the relative orientation of each experimental image from the last refinement of all the polished particles. The resulting experimental images were used for 3D refinement with a soft mask for the body or the head domain, yielding 4.4-Å and 4.8-Å reconstructions, respectively. Local resolution analysis for the SSU showed a range of 3.5-Å resolution in the core to 6 Å in the periphery (**Fig. S2**).

Reported resolutions are based on the gold-standard Fourier shell correlation (FSC) using the 0.143 criterion ([Rosenthal and Henderson, 2003](#)) (**Fig. S3**). High-resolution noise substitution was used to correct for the effects of soft masking on the FSC curves. All density maps were corrected for the modulation transfer function (MTF) of the K2 Summit direct detector and then sharpened by applying a negative B-factor that was estimated using post-processing in RELION 1.3. Local resolution was determined using ResMap ([Kucukelbir et al., 2014](#)) with half-reconstructions as input maps.

## Model building

Model building of the 67S LSU rRNA and proteins was executed by combining template guided and *de-novo* model building. Initial templates of rRNA and protein models were derived from previously reported structures of eukaryotic ribosomes or by homology based predicted models calculated by I-TASSER ([Yang et al., 2015](#)). Detailed information on the models used for each ribosomal segment is found in **Table S1**. Initial models were docked as rigid bodies into the cryo-EM maps using Chimera ([Pettersen et al., 2004](#)). The docked models were mutated and manually adjusted using COOT ([Emsley et al., 2010](#)) real-space and geometry restraint commands to fit into the density maps. The rRNA and protein sequences used for modeling were extracted from the *L. donovani* GR356 whole genome sequence that was annotated based on the *L. infantum* (JPCM5) and *L. donovani* (BPK282A1) genomes deposited at TriTrypDB ([Aslett et al. 2010](#)). Accurate sequences for the Ethiopian *L. donovani* strain, showing the differences with the Nepalese reference strain (BPK282A1) are provided in supplemental **Table S1**. Protein content was also examined by MS analysis (**Table S1**). The high-resolution map areas also enabled *de-novo* building of several rRNA domains that differed from the templates. rRNA modifications and solvated ions that were clearly observed in our maps were also modeled. A list of all modified residues is presented in supplemental **Table S2**. Lower resolution areas corresponding to uL6 and uL16, which were clearly observed in our unsharpened maps, were also assigned to the model. Models for uL6 and uL16 were built based on homology using the I-TASSER server ([Yang et al., 2015](#)) and were docked to the corresponding EM density. Poorly ordered regions residing on the ribosome periphery were excluded from the final model.

## Model refinement and validation

Model refinement was performed using an iterative approach including real space refinement and geometry regularization in COOT (Emsley et al., 2010) combined with real space refinement with PHENIX (Afonine et al., 2013) and its routine *phenix.real\_space\_refine*. All model components (rRNA, rProteins and solvent molecules) were fit to the map density with simultaneous optimization of stereochemical properties (bond lengths, angles, torsion angles, planarity, etc.) and correction of intra- and inter-molecular clashes.

For atomic coordinate refinement, the final EM map was clipped to a unit cell that accommodated the entire LSU, resulting in an arbitrary unit cell with dimensions of  $a=b=c=384\text{\AA}$ ,  $\alpha=\beta=\gamma=90^\circ$ , and P1 symmetry. The coarse structure obtained from model building was initially subjected to rigid body refinement as implemented in *phenix.real\_space\_refine* with each chain (rProtein or rRNA) defined as one rigid body. The entire model was subsequently subjected to real-space refinement using *phenix.real\_space\_refine* in order to improve the map fitting, the geometry and to avoid clashes. In a next step, map coordinates were Fourier transformed and the resulting structure factor values were used to calculate restrained group temperature factors (two B-factors per residues: one for the main chain and one for the side chain) on the previously refined model. Further model optimization was performed after categorizing the proteins chains according to their CC and their averaged temperature factor values. Proteins L6 and L16, for which homology models were employed, were excluded from these steps and were only included in the final refinement steps for the whole subunit.

In general, protein chains with averaged temperature factor values lower than  $20\text{\AA}^2$  were subjected to global and local refinements using *phenix.real\_space\_refine* (Afonine et al., 2013) and default constrains. Chains with temperature factor values of  $20\text{-}60\text{\AA}^2$  were refined similarly with tighter r.m.s.d bond length and angle constraints. Protein regions with temperature factor values exceeding  $60\text{\AA}^2$  were first submitted to morphing and then to global and local refinements with additional secondary structure constraints.

All rRNA chains were refined together following the same protocol that was used for the low-temperature factor rProteins set. The refined models were subsequently assembled to a unique set of coordinates and submitted to additional refinement cycles in order to improve the interface areas and minimize any inter-molecular clashes. The full LSU model was then subjected to systematic inspection and manual corrections using COOT (Emsley et al., 2010). Finally, the entire structure was validated using Molprobit (Chen et al., 2010) as implemented in Phenix (Afonine et al., 2013) and the correlation coefficients were calculated using *phenix.map\_model\_cc*. Model overfitting was evaluated through its refinement against one cryo-EM half map. FSC curves were calculated between the resulting model and the half map used for refinement (red curve, **Fig. S3**), as well as between the resulting model and the other half map for cross-validation (green curve, **Fig. S3**). The final refinement statistics are provided in **Figure S3C**.

## Liquid chromatography coupled mass spectrometry analysis (LC-MS)

The *L. donovani* 91S sample was loaded into a split-less nano-Ultra Performance Liquid Chromatography apparatus (10 kpsi nanoAcquity; Waters, Milford, MA, USA) and was desalted using a reversed-phase C18 trapping column (180  $\mu\text{m}$  internal diameter, 20 mm length, 5  $\mu\text{m}$  particle size; Waters). Peptides were separated using a T3 HSS nano-column (75  $\mu\text{m}$  internal diameter, 250 mm length, 1.8  $\mu\text{m}$  particle size; Waters) at 0.35  $\mu\text{L}/\text{min}$  and eluted into the mass spectrometer. The nanoUPLC was coupled online through a nanoESI emitter (10  $\mu\text{m}$  tip; New Objective; Woburn, MA, USA) to a quadrupole orbitrap mass spectrometer (Q Exactive Plus, Thermo Scientific) using a FlexIon nanospray apparatus (Proxeon). Data was acquired in DDA mode, using the Top20 method. MS1 resolution was set to 70,000 (at 400  $m/z$ ) and maximum injection time was set to 20 msec. MS2 resolution was set to 17,500 and maximum injection time of 60 ms. Raw data was processed using Proteome Discoverer v1.4.1.4. MS/MS spectra were searched using Mascot v2.5.1 (Matrix Sciences) and Sequest HT. Data was searched against the *L. donovani* sequences TriTrypDB LdBPK282A1



(<http://tritypdb.org/tritypdb/>). Fixed modification was set to carbamidomethylation of cysteines and variable modification was set to oxidation of methionines and deamidation of asparagines and glutamines. The identifications were filtered such that the global false discovery rate had a maximum of 1%.

### **Figure preparation**

Figures were created using VMD (<http://www.ks.uiuc.edu/>), PyMol ([Schrödinger 2010](#)), and the UCSF Chimera package ([Pettersen et al., 2004](#)). Local resolution plots were generated in ResMap ([Kucukelbir et al. 2014](#)).

## Supplemental References:

Anger, A.M. (2013). Structures of the human and *Drosophila* 80S ribosome. *Nature* 497, 80-85.

Aslett, M., Aurecochea, C., Berriman, M., Brestelli, J., Brunk, B.P., Carrington, M., Depledge, D.P., Fischer, S., Gajria, B., Gao, X., et al. (2010). TriTrypDB: a functional genomic resource for the Trypanosomatidae. *Nucleic Acids Res.* 38, D457-D462.

Ban, N., Beckmann, R., Cate, J.H., Dinman, J.D., Dragon, F., Ellis, S.R., Lafontaine, D.L., Lindahl, L., Liljas, A., Lipton, J.M., et al. (2014). A new system for naming ribosomal proteins. *Curr. Opin. Struct. Biol.* 24, 165-169.

Chen, V.B., Arendall, W.B., Headd, J.J., Keedy, D.A., Immormino, R.M., Kapral, G.J., Murray, L.W., Richardson, J.S., and Richardson, D.C. (2010). MolProbity: all-atom structure validation for macromolecular crystallography. *Acta. Crystallogr. D. Biol. Crystallogr.* 66, 12-21.

Kucukelbir, A., Sigworth, F.J., and Tagare, H.D. (2014). Quantifying the local resolution of cryo-EM density maps. *Nat. Methods* 11, 63-65.

Li, X., Mooney, P., Zheng, S., Booth, C.R., Braunfeld, M.B., Gubbens, S., Agard, D.A., and Cheng, Y. (2013). Electron counting and beam-induced motion correction enable near-atomic-resolution single-particle cryo-EM. *Nat. Methods.* 10, 584-590.

Pettersen, E.F., Goddard, T.D., Huang, C.C., Couch, G.S., Greenblatt, D.M., Meng, E.C., and Ferrin, T.E. (2004). UCSF Chimera-a visualization system for exploratory research and analysis. *J. Comput. Chem.* 25, 1605-1612.

Rosenthal, P.B., and Henderson, R.J. (2003). Optimal determination of particle orientation, absolute hand, and contrast loss in single-particle electron cryomicroscopy. *Mol. Biol.* 333, 721-745.

Sander, B., Golas, M.M., and Stark, H. (2003). Automatic CTF correction for single particles based upon multivariate statistical analysis of individual power spectra. *J. Struct. Biol.* 142, 392-401.

Schrödinger, L.L.C. (2010). Py-MOL, The PyMOL Molecular Graphics System, V1.8 (2010).

Yang, J., Yan, R., Roy, A., Xu, D., Poisson, J., and Zhang, Y. (2015). The I-TASSER Suite: protein structure and function prediction. *Nat. Methods* 12, 7-8.

Zackay, A., Nasereddin, A., Takele, Y., Tadesse, D., Hailu, W., Hurissa, Z., Yifru, S., Weldegebreal, T., Diro, E., Kassahun, A., et al. (2013). Polymorphism in the HASPB repeat region of East African *Leishmania donovani* strains. *PLoS. Negl. Trop. Dis.* 7, e2031.
